# Supplementary material
Source: PubMed Central journal article supplement (PMC7003313)
Supplement: ASN.2019050515SupplementaryData1.pdf [file ASN.2019050515SupplementaryData1.pdf]

## Supplemental TOC

**Supplementary Table I: Morphological Differences in atypical Hemolytic Uremic Syndrome (aHUS) and C3 Glomerulopathy**

**Supplementary Table II: Alterations in the Factor H-CFHR gene cluster in aHUS/dEAP-HUS and C3 glomerulopathy**

**Supplementary Table I: Morphological Differences in atypical Hemolytic Uremic Syndrome (aHUS) and C3 Glomerulopathy**

| <b>Disease</b>           | <b>Complement activation</b>           | <b>Morphologic pattern</b> | <b>Active phase</b>                                      | <b>Chronic phase</b>                              |
|--------------------------|----------------------------------------|----------------------------|----------------------------------------------------------|---------------------------------------------------|
| <b>aHUS</b>              | Strong, cell surface                   | TMA                        | Endothelial and mesangial cell lysis, thrombus formation | Formation of new extracellular matrix at the GBM  |
| <b>C3 Glomerulopathy</b> | Moderate, fluid phase and cell surface | MPGN / DDD                 | Mesangial cell proliferation, inflammatory cell influx   | New extracellular matrix at the GBM and mesangium |

TMA = thrombotic microangiopathy, MPGN = membranoproliferative glomerulonephritis, DDD = dense deposit disease, GBM = glomerular basement membrane.
